# Supplementary material for: Electric field-induced switching of anomalous Nernst conductivity in the 2D MoTe2/VSe2 heterostructure
Source: Royal Society of Chemistry journal article supplement (doi:10.1039/d2cp03011j), 2022-01-01
Supplement: d2cp03011j1.pdf [file d2cp03011j1.pdf]

## **Supplementary Information**

### **Electric field induced switching of anomalous Nernst conductivity in 2D**

#### **MoTe<sub>2</sub>/VSe<sub>2</sub> heterostructure**

Brahim Marfoua and Jisang Hong\*

Department of Physics, Pukyong National University, Busan 48513, Korea

#### **Corresponding Authors**

*\*E-mail: hongj@pknu.ac.kr*

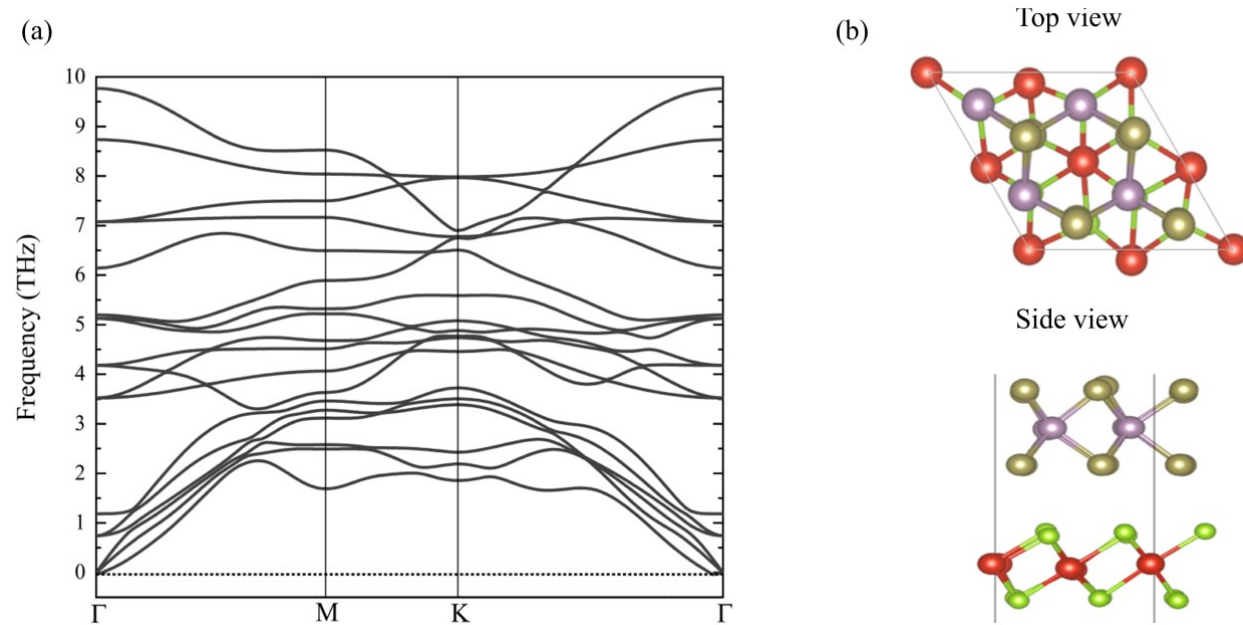

**Fig. S1** (a) calculated phonon dispersion of the MoTe<sub>2</sub>/VSe<sub>2</sub> heterostructure. (b) Top and side views snapshot of the molecular dynamics simulations of the MoTe<sub>2</sub>/VSe<sub>2</sub> heterostructure at 300 K up 5 ps.

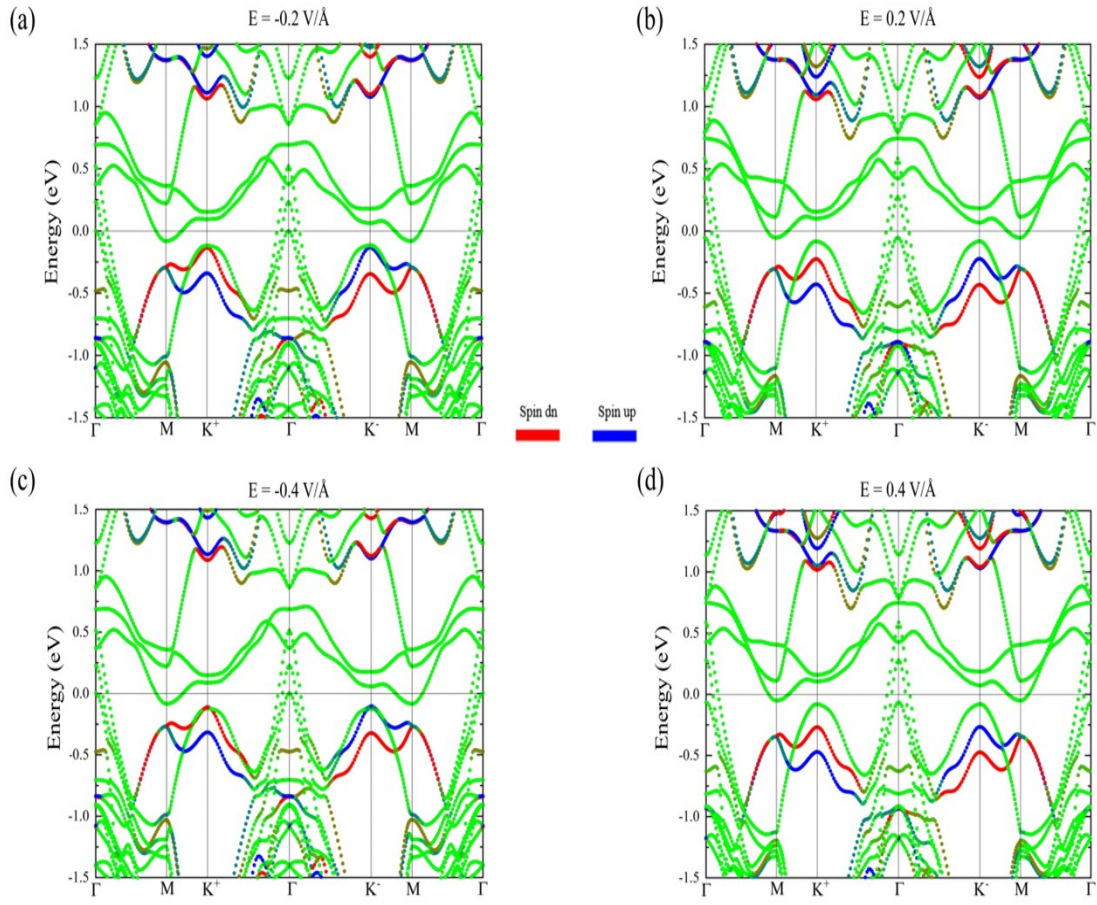

**Fig. S2** Electric field dependent SOC band structure of the MoTe<sub>2</sub>/VSe<sub>2</sub> heterostructure at (a)  $E = -0.2 \text{ V/\AA}$ , (b)  $E = 0.2 \text{ V/\AA}$ , (c)  $E = -0.4 \text{ V/\AA}$  and (d)  $E = 0.4 \text{ V/\AA}$ . Here, the green line represents the contribution from the VSe<sub>2</sub> layer while the blue line represents the majority spin component and the red line is the minority spin component from the MoTe<sub>2</sub> layer.

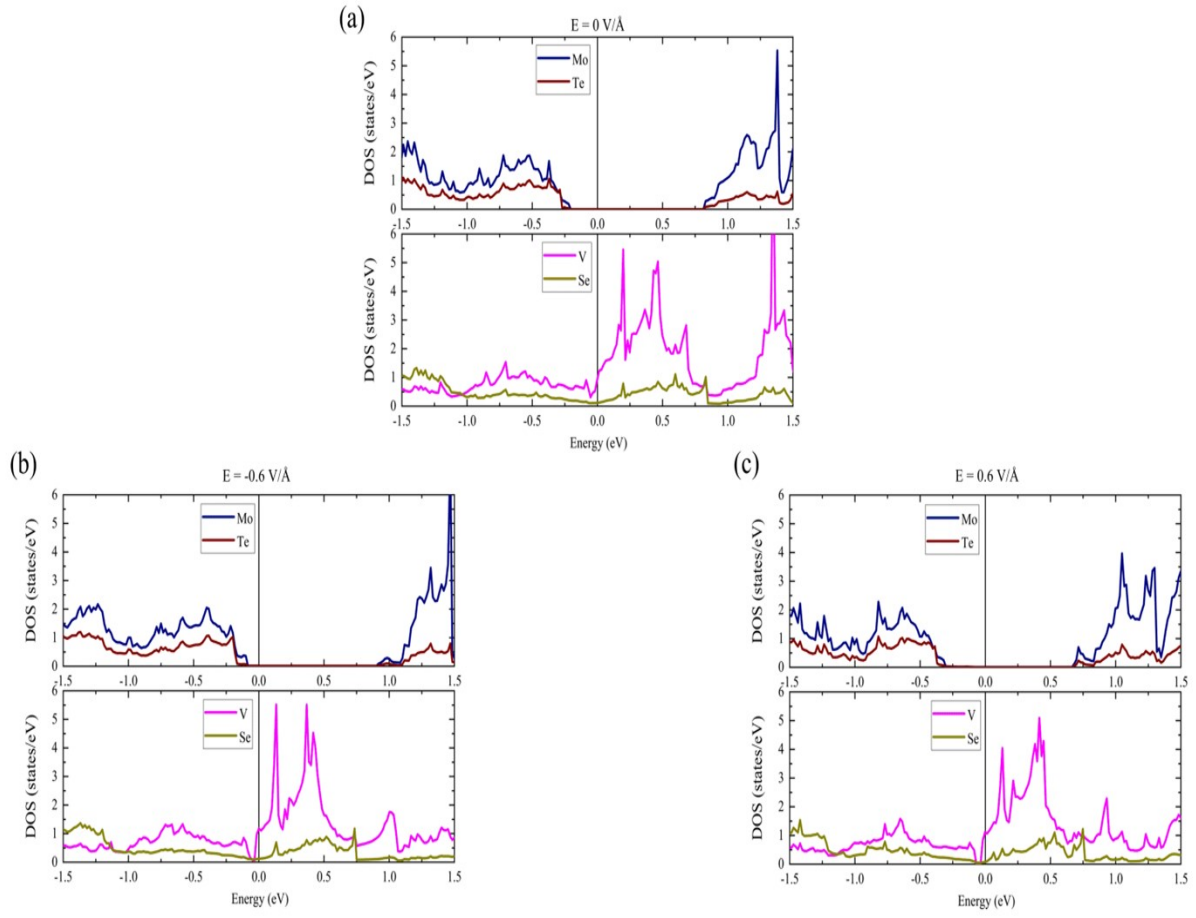

**Fig. S3** Layer dependent density of states (DOS) of MoTe<sub>2</sub>/VSe<sub>2</sub> heterostructure at (a)  $E = 0 \text{ V/\AA}$ , (b)  $E = -0.6 \text{ V/\AA}$ , and (c)  $E = 0.6 \text{ V/\AA}$ .

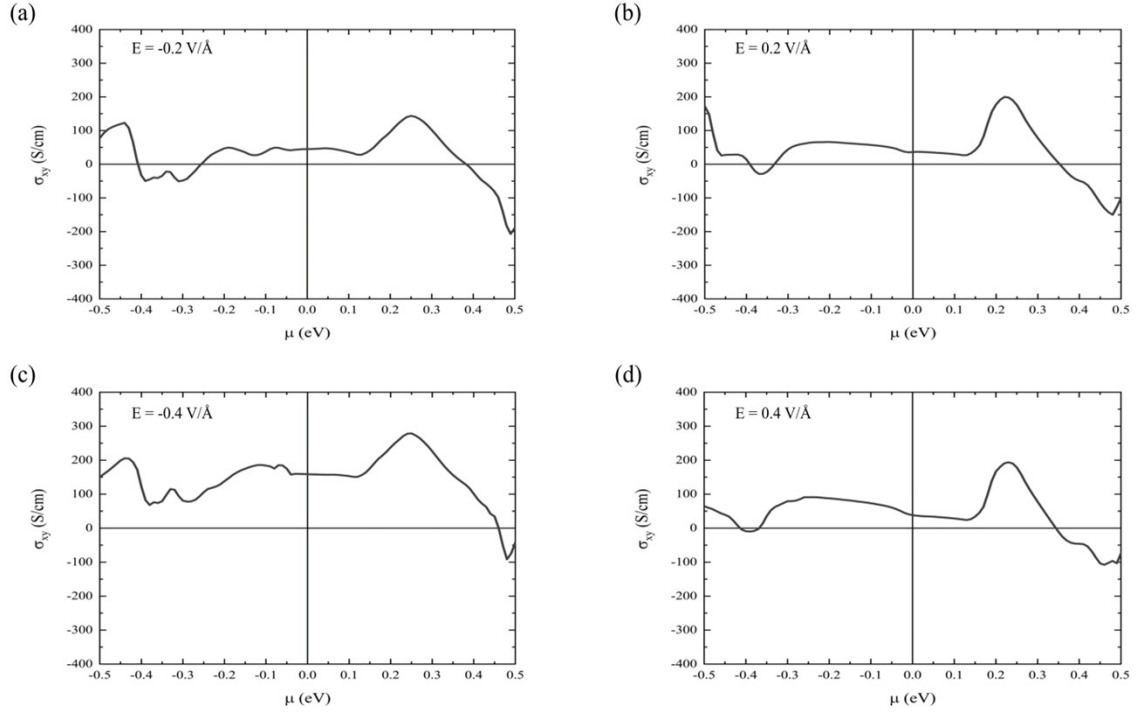

**Fig. S4** Electric field dependent anomalous Hall conductivity ( $\sigma_{xy}$ ) as a function of chemical potential ( $\mu$ ) at (a)  $E = -0.2 \text{ V/\AA}$ , (b)  $E = 0.2 \text{ V/\AA}$ , (c)  $E = -0.4 \text{ V/\AA}$  and (d)  $E = 0.4 \text{ V/\AA}$ .

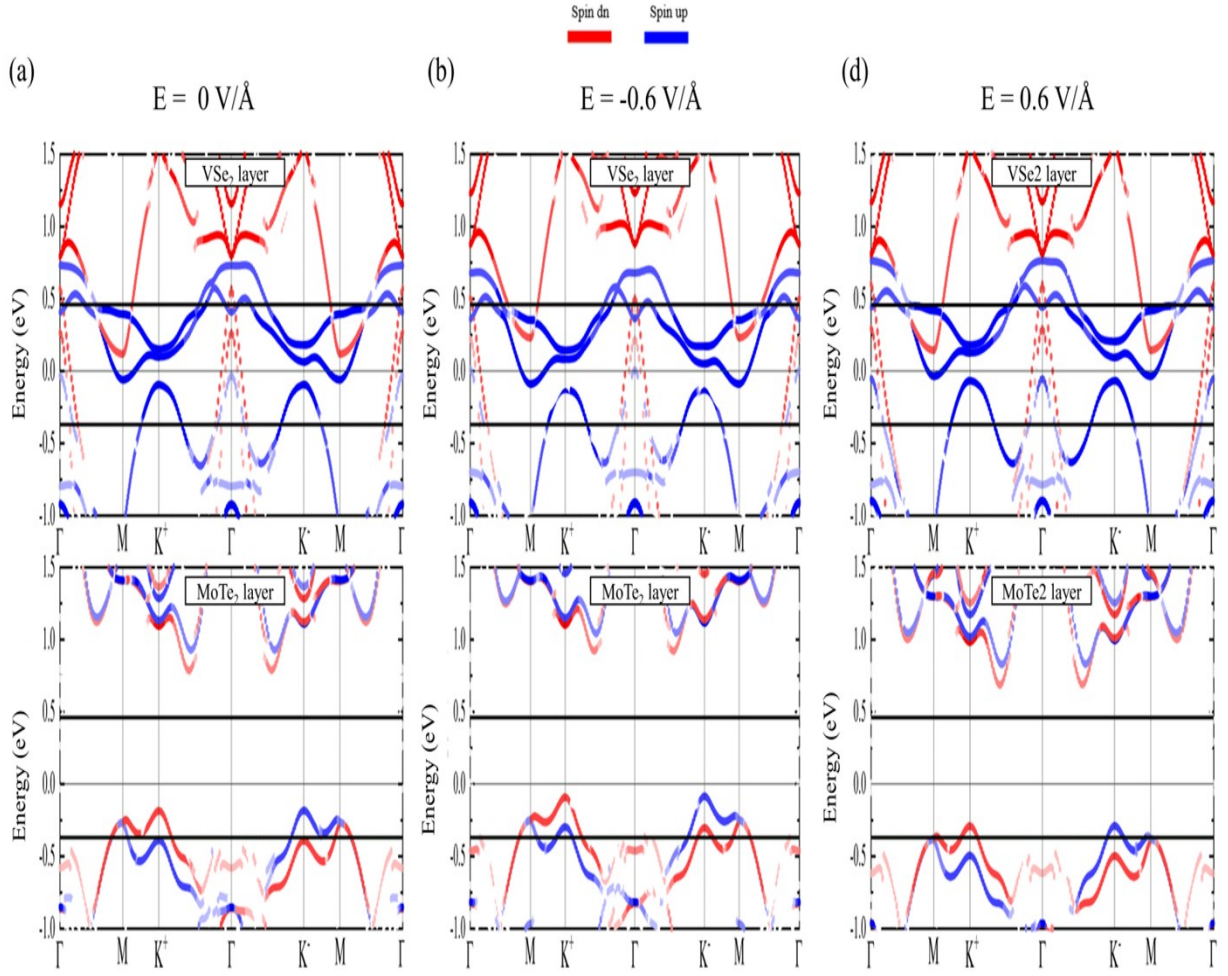

**Fig. S5** Layer dependent projected SOC band structure of MoTe<sub>2</sub>/VSe<sub>2</sub> heterostructure at (a)  $E = 0 \text{ V/\AA}$ , (b)  $E = -0.6 \text{ V/\AA}$ , and (c)  $E = 0.6 \text{ V/\AA}$ . Here, the blue line represents the majority spin component and the red line is the minority spin component.

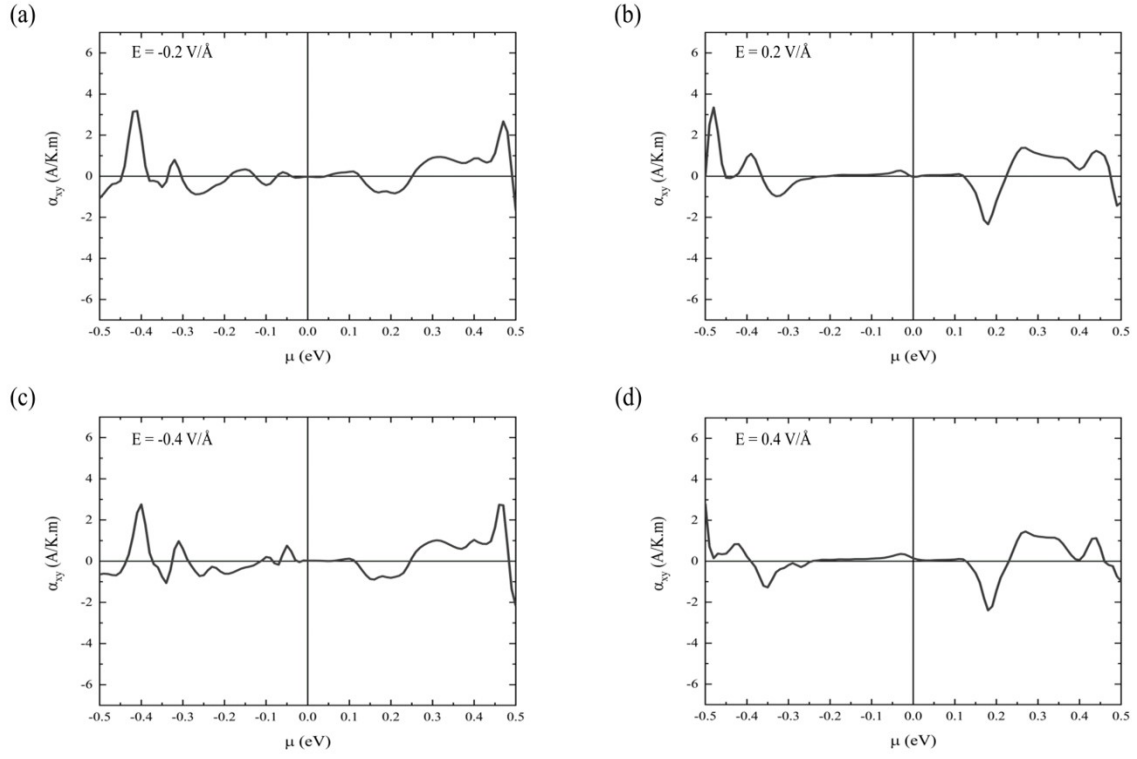

**Fig. S6** Electric field dependent anomalous Nernst conductivity ( $\alpha_{xy}$ ) as a function of chemical potential ( $\mu$ ) at (a)  $E = -0.2 \text{ V/\AA}$ , (b)  $E = 0.2 \text{ V/\AA}$ , (c)  $E = -0.4 \text{ V/\AA}$  and (d)  $E = 0.4 \text{ V/\AA}$ .
